# Supplementary material for: Structure–Properties Relationship of Reprocessed Bionanocomposites of Plasticized Polylactide Reinforced with Nanofibrillated Cellulose
Source: MDPI journal article supplement (doi:10.3390/app122412821), 2022-12-14
Supplement: s1 [file s1]

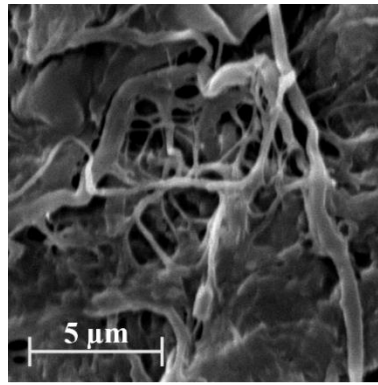

**Figure S1.** SEM micrograph of the NFC.

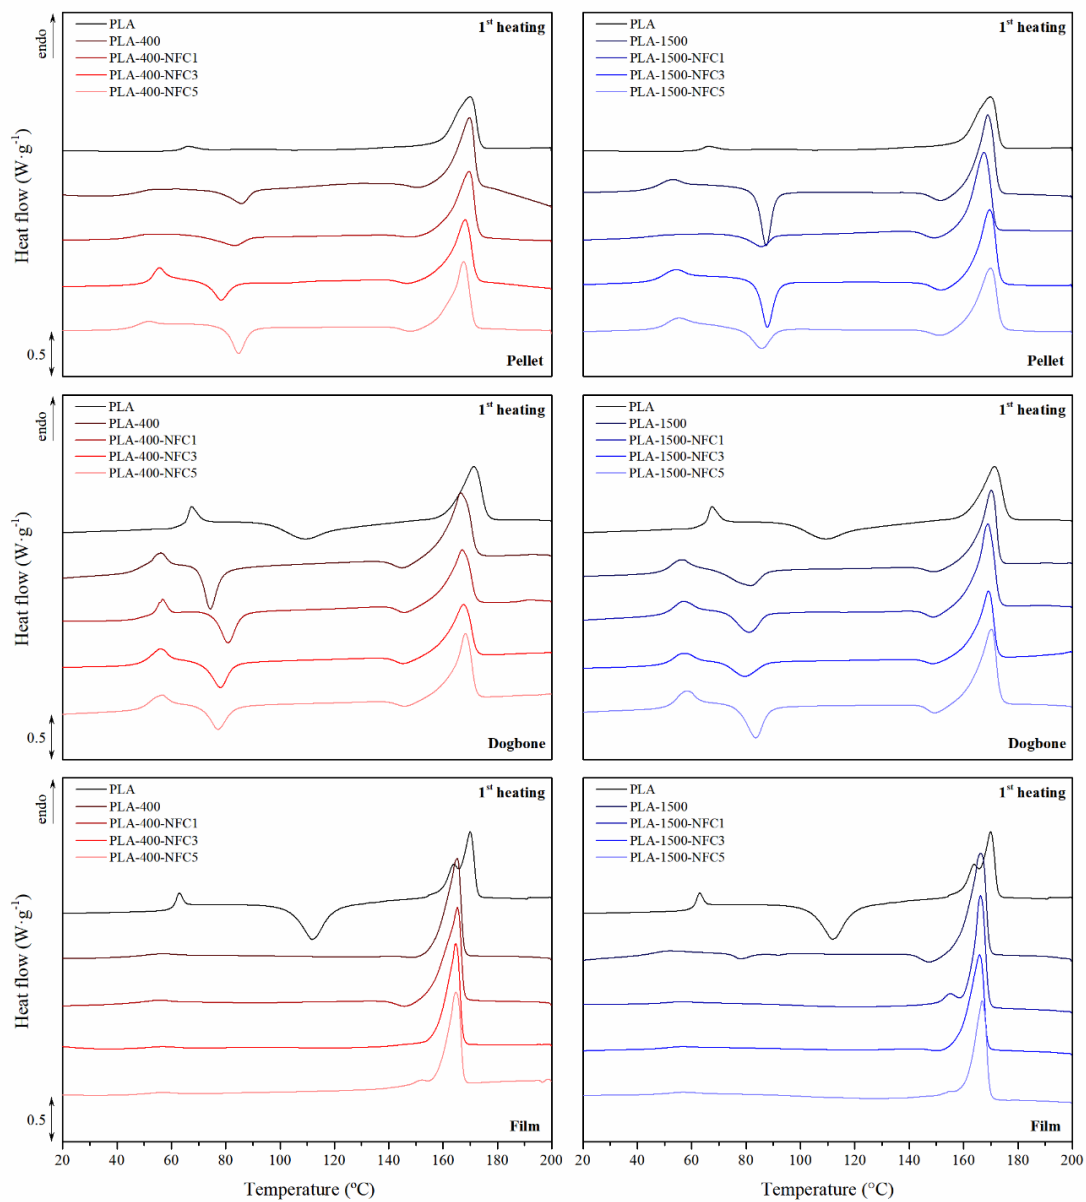

**Figure S2.** Calorimetric thermograms for the first heating scan of PLA, PLA-PEG blends and PLA-PEG-NFC bionanocomposites after the subsequent stages of compounding, dogbone and film specimen preparation.

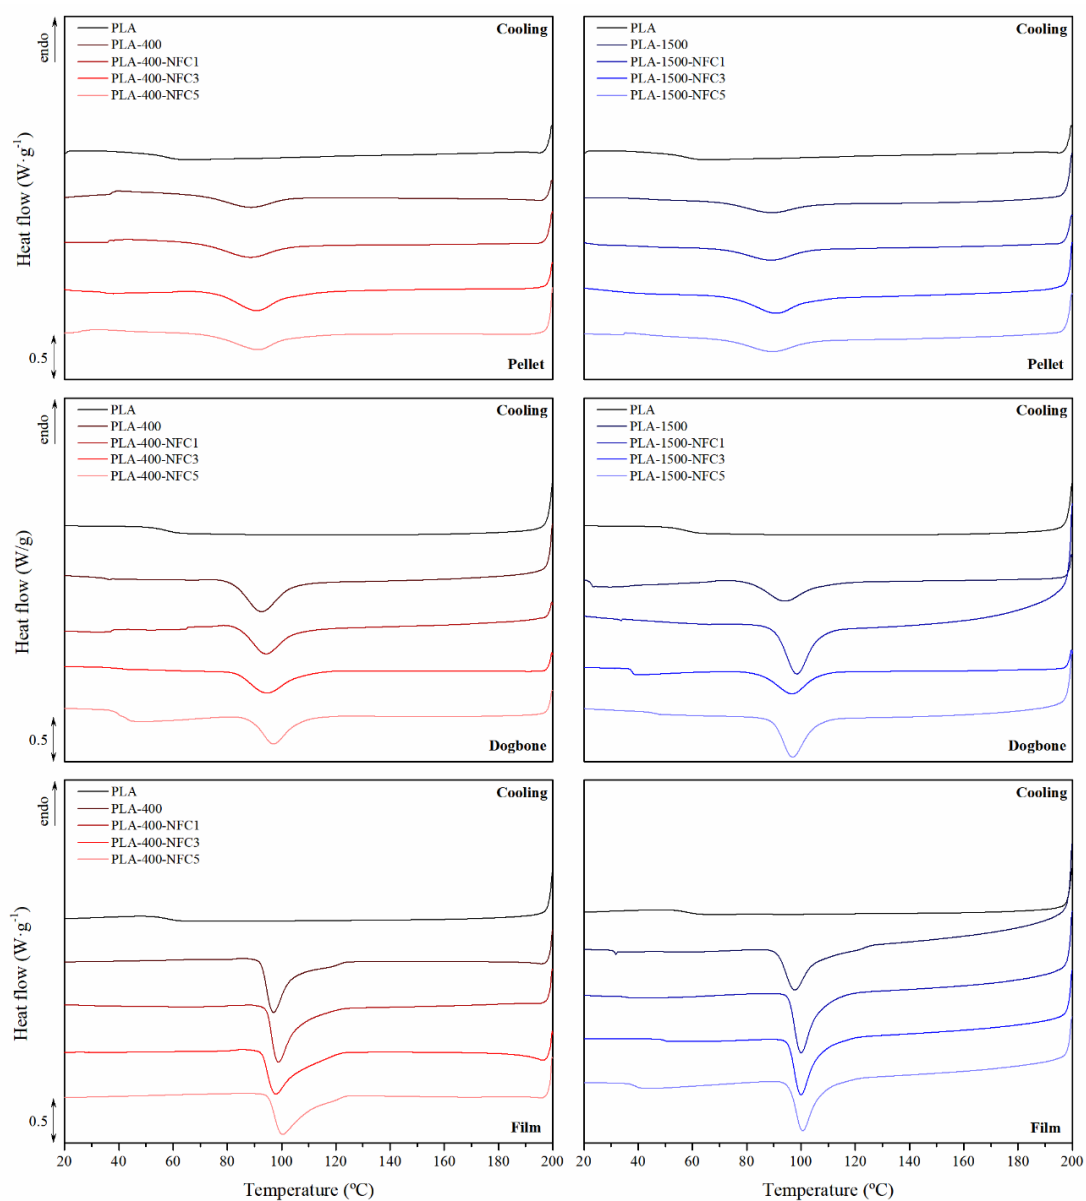

**Figure S3.** Calorimetric thermograms for the cooling scan of PLA, PLA-PEG blends and PLA-PEG-NFC bionanocomposites after the subsequent stages of compounding, dogbone and film specimen preparation.

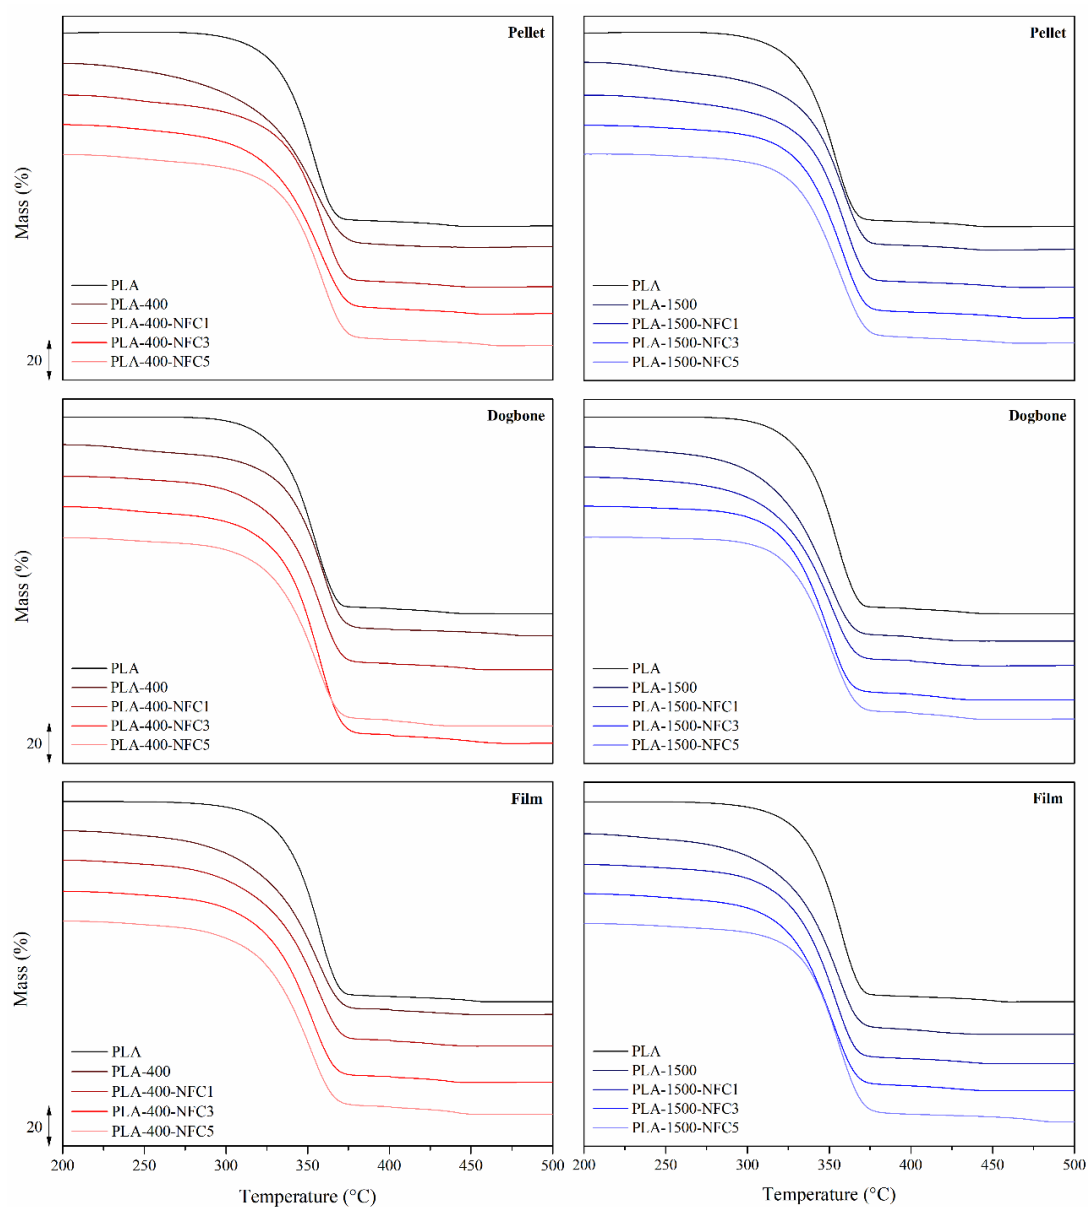

**Figure S4.** Thermogravimetric thermograms (TG) of PLA, PLA-PEG blends and PLA-PEG-NFC bionanocomposites after the subsequent stages of compounding, dogbone and film specimen preparation.

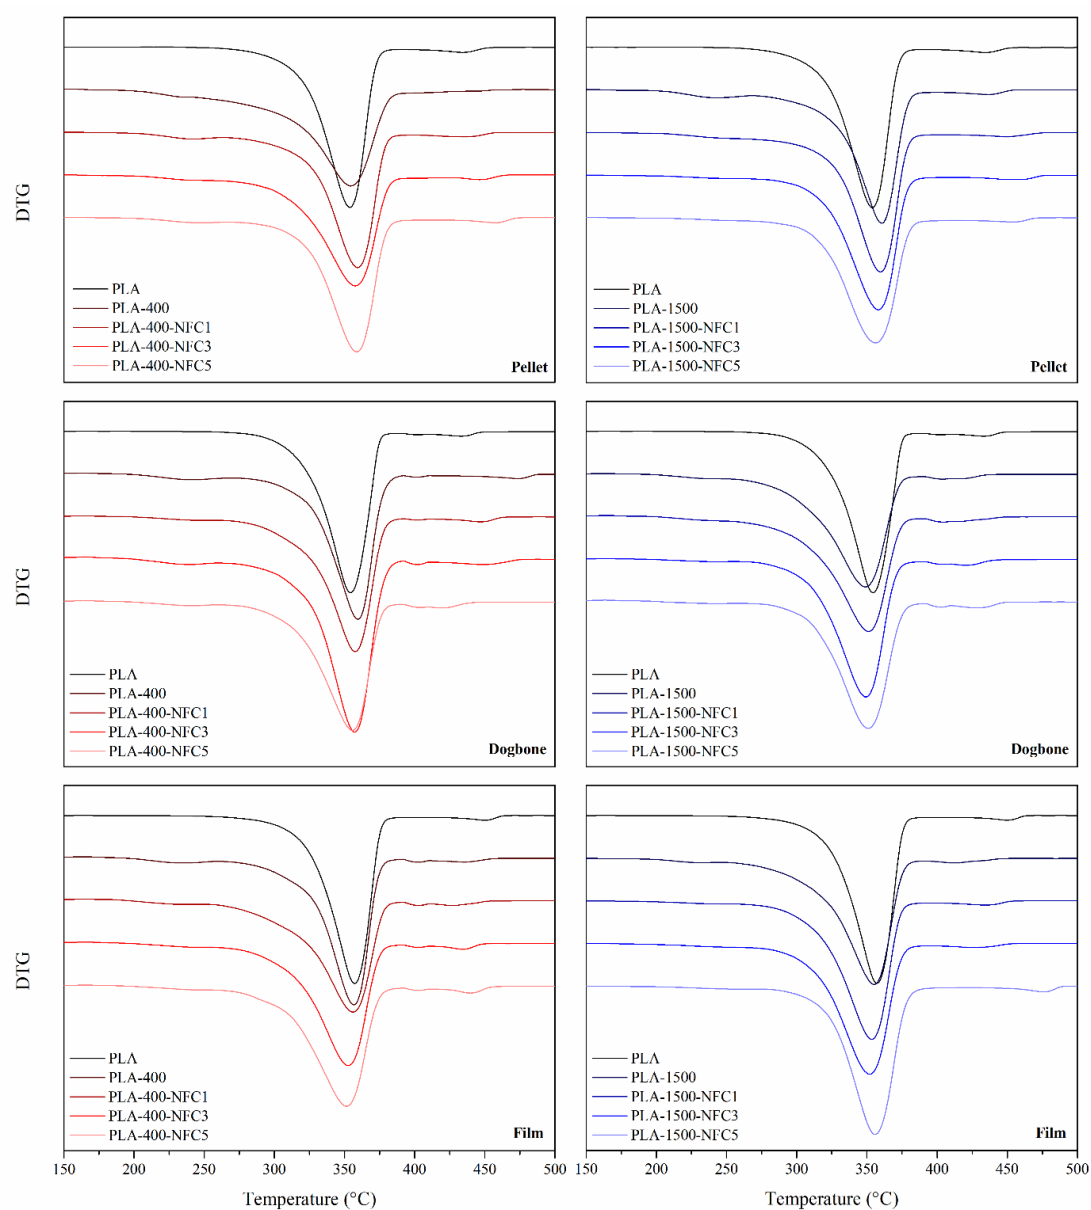

**Figure S5.** Derivative thermogravimetric thermograms (DTG) of PLA, PLA-PEG blends and PLA-PEG-NFC bionanocomposites after the subsequent stages of compounding, dogbone and film specimen preparation.

**Table S1.** Key parameters overviewing the structural and morphological consequences of processing in terms of molar mass ( $M_n$ ,  $M_w$ ), amorphous/crystalline morphology ( $T_g$ ,  $X_c$  and  $l_c$ ).  $C$  stands for compounding,  $D$  for dogbone and  $F$  for film specimens.

|               |     | $M_n$<br>(g·mol <sup>-1</sup> ) | $M_w$<br>(g·mol <sup>-1</sup> ) | $T_g$<br>(°C) | $X_c$<br>(%) | $l_c$<br>(nm) |
|---------------|-----|---------------------------------|---------------------------------|---------------|--------------|---------------|
| PLA           | $C$ | 56900 (±2700)                   | 115800 (±200)                   | 56.3 (±0.8)   | 2.2 (±0.6)   | 13.3 (±0.1)   |
|               | $D$ | 48800 (±3000)                   | 106100 (±150)                   | 57.2 (±0.5)   | 11.4 (±1.5)  | 13.7 (±0.0)   |
|               | $F$ | 39700 (±200)                    | 76100 (±370)                    | 58.0 (±0.3)   | 12.5 (±3.5)  | 14.1 (±0.0)   |
| PLA-400       | $C$ | 55400 (±1100)                   | 87600 (±200)                    | 42.0 (±1.4)   | 27.4 (±3.4)  | 13.1 (±0.2)   |
|               | $D$ | 31500 (±3500)                   | 66000 (±150)                    | 42.0 (±0.0)   | 29.2 (±1.1)  | 12.6 (±0.0)   |
|               | $F$ | 26100 (±1600)                   | 40300 (±1900)                   | 40.1 (±0.6)   | 39.3 (±0.9)  | 12.3 (±0.1)   |
| PLA-400-NFC1  | $C$ | 46900 (±900)                    | 84300 (±280)                    | 49.3 (±0.5)   | 32.3 (±2.0)  | 12.8 (±0.1)   |
|               | $D$ | 33800 (±1600)                   | 58000 (±60)                     | 45.3 (±0.7)   | 34.0 (±1.5)  | 12.8 (±0.0)   |
|               | $F$ | 25350 (±700)                    | 39900 (±440)                    | 44.1 (±0.2)   | 39.7 (±0.3)  | 12.5 (±0.0)   |
| PLA-400-NFC3  | $C$ | 49400 (±600)                    | 86000 (±1800)                   | 47.6 (±0.2)   | 32.7 (±1.3)  | 12.8 (±0.1)   |
|               | $D$ | 27000 (±300)                    | 65500 (±60)                     | 47.8 (±0.2)   | 36.7 (±1.7)  | 12.6 (±0.0)   |
|               | $F$ | 28900 (±610)                    | 34600 (±230)                    | 46.0 (±0.1)   | 37.2 (±3.2)  | 12.3 (±0.0)   |
| PLA-400-NFC5  | $C$ | 48700 (±1300)                   | 88000 (±700)                    | 47.5 (±1.8)   | 30.1 (±2.1)  | 12.8 (±0.1)   |
|               | $D$ | 23000 (±2000)                   | 62400 (±20)                     | 45.1 (±1.0)   | 34.3 (±0.4)  | 12.7 (±0.0)   |
|               | $F$ | 20600 (±430)                    | 35900 (±360)                    | 45.7 (±1.0)   | 35.6 (±1.9)  | 12.3 (±0.1)   |
| PLA-1500      | $C$ | 59900 (±2900)                   | 92500 (±4600)                   | 42.8 (±1.1)   | 25.5 (±1.3)  | 13.2 (±0.0)   |
|               | $D$ | 32500 (±400)                    | 69800 (±160)                    | 40.4 (±1.9)   | 31.8 (±1.0)  | 13.2 (±0.1)   |
|               | $F$ | 23300 (±400)                    | 42000 (±30)                     | 41.0 (±0.8)   | 32.0 (±2.4)  | 13.1 (±0.0)   |
| PLA-1500-NFC1 | $C$ | 57800 (±2800)                   | 93500 (±4700)                   | 47.4 (±0.5)   | 28.4 (±2.6)  | 13.4 (±0.1)   |
|               | $D$ | 29600 (±200)                    | 65000 (±50)                     | 44.8 (±0.4)   | 32.2 (±0.1)  | 13.1 (±0.0)   |
|               | $F$ | 20500 (±300)                    | 34300 (±100)                    | 40.3 (±0.6)   | 38.7 (±0.1)  | 12.8 (±0.1)   |
| PLA-1500-NFC3 | $C$ | 57400 (±2800)                   | 93000 (±4600)                   | 46.1 (±0.9)   | 28.3 (±0.8)  | 13.3 (±0.1)   |
|               | $D$ | 30800 (±300)                    | 68700 (±120)                    | 45.4 (±0.6)   | 31.5 (±2.1)  | 13.2 (±0.0)   |
|               | $F$ | 22300 (±30)                     | 35000 (±190)                    | 41.8 (±1.6)   | 34.9 (±0.5)  | 12.8 (±0.0)   |
| PLA-1500-NFC5 | $C$ | 51500 (±300)                    | 93600 (±500)                    | 47.5 (±0.7)   | 28.4 (±2.3)  | 13.4 (±0.0)   |
|               | $D$ | 31500 (±1000)                   | 66600 (±190)                    | 45.5 (±0.9)   | 29.8 (±1.6)  | 13.5 (±0.1)   |
|               | $F$ | 28500 (±400)                    | 42900 (±10)                     | 42.3 (±3.0)   | 31.4 (±0.3)  | 13.0 (±0.1)   |

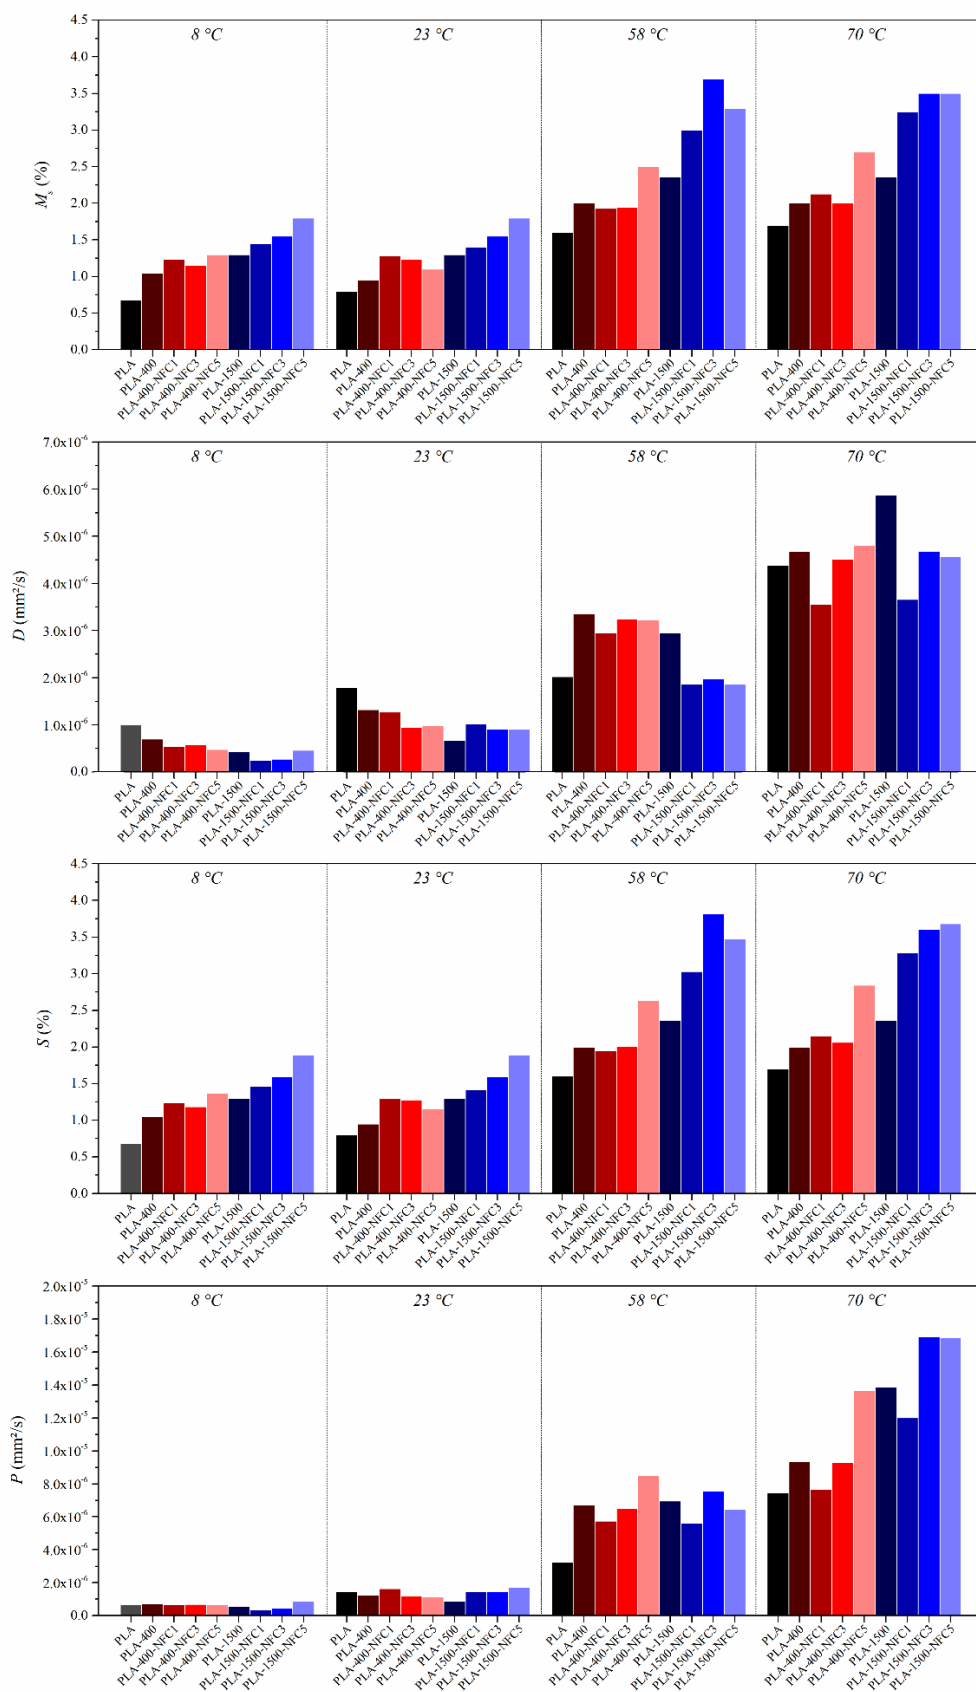

**Figure S6.** Diffusion coefficient ( $D$ ), the solubility coefficient ( $S$ ), and permeability coefficient ( $P$ ) for the PLA, PLA/PEG and PLA/PEG/NFC nanocomposite films at 8, 23, 58, and 70 °C.
